# Supplementary material for: The SGLT-2 Inhibitors in Personalized Therapy of Diabetes Mellitus Patients
Source: MDPI journal article supplement (doi:10.3390/jpm11121249), 2021-11-25
Supplement: s1 [file s1]

**Table S1.** Summary of SGLT-2i effects on glycemic control as found in several studies

| First author             | Aim                                                                                                                                                       | Main results                                                                                                                                                                                        |
|--------------------------|-----------------------------------------------------------------------------------------------------------------------------------------------------------|-----------------------------------------------------------------------------------------------------------------------------------------------------------------------------------------------------|
| Bailey <sup>39</sup>     | To assess the efficacy and safety of dapagliflozin in subjects with poorly controlled type 2 DM under metformin                                           | Dapagliflozin 2.5 mg, 5 mg, and 10 mg produced a significant greater HbA1c reduction vs placebo (-0.67% vs -0.70% vs -0.84% vs -0.30%)                                                              |
| Vasilakou <sup>40</sup>  | To assess the efficacy and safety of SGLT-2i in adults with type 2 DM                                                                                     | SGLT-2i in monotherapy reduced Hb1c by 0.79% and by 0.61% as add-on therapy to other antidiabetic agents                                                                                            |
| Stenlöf <sup>41</sup>    | To assess the efficacy and safety of canagliflozin in type 2 DM subjects with poor glycemic control under diet and exercise                               | Canagliflozin 100 and 300 mg produced a significant greater HbA1c reduction vs placebo (-0.77% vs -1.03% vs -0.14%)                                                                                 |
| Søfteland <sup>42</sup>  | To assess the efficacy and safety of empagliflozin when added to linagliptin and metformin in subjects with poorly controlled type 2 DM                   | Empagliflozin 10 mg and 25 mg significantly reduced HbA1c vs placebo<br>Empagliflozin significantly reduced FPG vs placebo                                                                          |
| Miller <sup>43</sup>     | To assess the efficacy and safety of ertugliflozin plus sitagliptin in subjects with poorly controlled type 2 DM under diet and exercise                  | Ertugliflozin 15 mg + Sitagliptin 100 mg reduced HbA1c by 1.7%<br>Ertugliflozin 5 mg + Sitagliptin 100 mg reduced HbA1c by 1.6%<br>Ertugliflozin significantly reduced FPG and postprandial glucose |
| Shyangdan <sup>44</sup>  | To indirectly compare SGLT-2i in the treatment of type 2 DM                                                                                               | Canagliflozin 300 mg achieved a greater HbA1c reduction vs canagliflozin 100 mg and vs dapagliflozin<br>Canagliflozin 300 mg produced no significant differences when compared to empagliflozin     |
| Goring <sup>45</sup>     | To assess HbA1c change when TZD, SU, DDP4-i, or dapagliflozin were added to metformin in subjects with poorly controlled type 2 DM                        | The treatment effects of dapagliflozin on HbA1c was -0.08% relative to DDP4-I, -0.02% relative to TZD and 0.00% relative to SU                                                                      |
| Yang <sup>46</sup>       | To assess the efficacy and tolerability of canagliflozin as add-on therapy to metformin in subjects with type 2 DM                                        | Canagliflozin 100 and 300 mg reduced HbA1c by 0.59% and 0.75%, respectively<br>Canagliflozin 100 and 300 mg reduced FPG by 1.49 mmol/L and 1.80 mmol/L, respectively                                |
| Sun <sup>47</sup>        | To assess if dapagliflozin is synergistic with other antidiabetic drugs without body weight gain                                                          | Dapagliflozin reduced HbA1c by 0.52% and FPG by 20 mg/dL when added to other antidiabetic drugs                                                                                                     |
| Zaccardi <sup>48</sup>   | To assess the efficacy and safety of SGLT-2i in adults with type 2 DM                                                                                     | SGLT-2i decreased HbA1c by 0.6-0.9% and FPG by 1.1-1.9 mmol/L                                                                                                                                       |
| Rosenstock <sup>49</sup> | To assess the efficacy and safety of ertugliflozin in subjects with poorly controlled type 2 DM under metformin                                           | Ertugliflozin 5 and 15 mg reduced HbA1c by 0.7% and 0.9%, respectively                                                                                                                              |
| Henry <sup>50</sup>      | To compare dapagliflozin 10 mg/day vs placebo by monitoring 24-hour glycemic profile using continuous glucose monitoring in adult subjects with type 2 DM | Dapagliflozin 10 mg/day achieved a mean glucose reduction by 18.2 mg/dL while placebo had an increase by 5.8 mg/dL                                                                                  |

|                        |                                                                                                                                                                                                                                                                   |                                                                                                                                                                                                                                                                           |
|------------------------|-------------------------------------------------------------------------------------------------------------------------------------------------------------------------------------------------------------------------------------------------------------------|---------------------------------------------------------------------------------------------------------------------------------------------------------------------------------------------------------------------------------------------------------------------------|
| Kovacs <sup>51</sup>   | To assess the efficacy and safety of empagliflozin as add-on to pioglitazone and/or metformin in subjects with type 2 DM                                                                                                                                          | Empagliflozin 10 mg/day and 25 mg/day achieved a HbA1c reduction of -0.6% and -0.7%, respectively vs -0.1% with placebo<br><br>Empagliflozin 10 mg/day and 25 mg/day achieved a FPG reduction of -0.94 mmol/L and -1.22 mmol/L, respectively vs +0.36 mmol/L with placebo |
| Terauchi <sup>52</sup> | To assess the safety, tolerability, and efficacy of empagliflozin as add-on to liraglutide in subjects with type 2 DM                                                                                                                                             | Empagliflozin 10 mg/day and 25 mg/day reduced HbA1c by -0.55% and -0.77%, respectively<br><br>Empagliflozin 10 mg/day and 25 mg/day reduced FPG by -32.5 mg/dL and -36 mg/dL, respectively                                                                                |
| Terra <sup>53</sup>    | To assess the safety and efficacy of ertugliflozin as monotherapy in subjects with type 2 DM                                                                                                                                                                      | Ertugliflozin 5 mg/day and 15 mg/day reduced HbA1c by -0.99% and by -1.16%, respectively<br><br>Ertugliflozin 5 mg/day and 15 mg/day reduced FPG by -1.92 mmol/L and by -2.44 mmol/L, respectively                                                                        |
| Abbreviations          | DDP4-i, dipeptidyl peptidase inhibitors; FPG, fasting plasma glucose; HbA1c, glycated hemoglobin; mg, milligram; SGLT-2i, sodium-glucose cotransporter-2 inhibitors; SU, sulphonylureas; TZD, thiazolidinediones; type 2 DM, type 2 diabetes mellitus; vs, versus |                                                                                                                                                                                                                                                                           |
