# Supplementary material for: The SGLT-2 Inhibitors in Personalized Therapy of Diabetes Mellitus Patients
Source: MDPI journal article supplement (doi:10.3390/jpm11121249), 2021-11-25
Supplement: s1 [file s1]

**Table S2.** Summary of SGLT-2i cardiorenal outcomes as reported in randomized clinical trials

| Clinical trial                  | Design                                                                                                                                                                                                                                                                                                                                                                                                                                                                                                                                            | Aim                                                                                                                                                                                                                                 | Main outcomes                                                                                                                                                                                                                                                                                                                                                                                            |
|---------------------------------|---------------------------------------------------------------------------------------------------------------------------------------------------------------------------------------------------------------------------------------------------------------------------------------------------------------------------------------------------------------------------------------------------------------------------------------------------------------------------------------------------------------------------------------------------|-------------------------------------------------------------------------------------------------------------------------------------------------------------------------------------------------------------------------------------|----------------------------------------------------------------------------------------------------------------------------------------------------------------------------------------------------------------------------------------------------------------------------------------------------------------------------------------------------------------------------------------------------------|
| DECLARE-TIMI 58 <sup>78</sup>   | Multinational, randomized, double-blind, placebo-controlled phase IIIB trial<br><br>Subjects with type 2 DM who had or were at risk for ASCVD received either dapagliflozin (10 mg/day) or placebo                                                                                                                                                                                                                                                                                                                                                | To test if long-term treatment with dapagliflozin reduces one or both of primary endpoints: (1) MACE defined as cardiovascular death, myocardial infarction, or ischemic stroke or (2) the incidence of cardiovascular death or hHF | Number of subjects: 17.160.<br><i>Dapagliflozin group</i> – 8582<br><i>Placebo group</i> – 8578<br><br>Dapagliflozin did not result in a higher or lower rate of MACE (8.8% in dapagliflozin group vs 9.4% in placebo group). However, it did result in a lower rate of cardiovascular death or hHF (4.9% vs 5.8%)                                                                                       |
| CANVAS program <sup>77,82</sup> | Two double-blind, placebo-controlled, randomized trials, phase III (CANVAS) and phase IV (CANVAS-R)<br>CANVAS: Subjects with type 2 DM with history of cardiovascular events or increased risk for cardiovascular events were randomized to treatment with 1 of 2 doses of canagliflozin (100 or 300 mg) or placebo.<br>CANVAS-R: Subjects with type 2 DM with a history of cardiovascular events or increased risk for cardiovascular events were randomized to canagliflozin (100 mg for 13 weeks then might be increased to 300 mg) or placebo | To assess canagliflozin vs placebo in the treatment of subjects with type 2 DM regarding its cardiovascular risk for MACE and the progression of albuminuria                                                                        | Number of subjects: 10.142<br><i>CANVAS</i> – 4330<br><i>CANVAS-R</i> – 5812<br><br>Canagliflozin was associated with reduced risk of sustained loss of kidney function<br><br>Canagliflozin reduced hHF in patients with type 2 DM and ASCVD or at high risk for cardiovascular events<br><br>Canagliflozin reduced the risk of death from MACE<br><br>Increased risk of amputation compared to placebo |
| DAPA-CKD <sup>80</sup>          | Multicentre, randomized, double-blind, placebo-controlled phase III trial                                                                                                                                                                                                                                                                                                                                                                                                                                                                         | To assess the effect of dapagliflozin on renal outcomes and cardiovascular mortality in subjects with CKD                                                                                                                           | Number of subjects: 4304<br><i>Dapagliflozin group</i> – 2152<br><i>Placebo group</i> – 2152<br><br>Dapagliflozin treated subjects had lower risk of sustained decline in eGFR of at least 50%,                                                                                                                                                                                                          |

|                                         |                                                                                                                                                                                      |                                                                                                                                            |                                                                                                                                                                                                                                                                                                                                                                                                                                                             |
|-----------------------------------------|--------------------------------------------------------------------------------------------------------------------------------------------------------------------------------------|--------------------------------------------------------------------------------------------------------------------------------------------|-------------------------------------------------------------------------------------------------------------------------------------------------------------------------------------------------------------------------------------------------------------------------------------------------------------------------------------------------------------------------------------------------------------------------------------------------------------|
|                                         | Subjects with eGFR between 25-75 ml/minute/1.73 m <sup>2</sup> , with or without type 2 DM, received either dapagliflozin (10 mg/day) or placebo                                     |                                                                                                                                            | end-stage kidney disease, or death from renal or cardiovascular causes                                                                                                                                                                                                                                                                                                                                                                                      |
| CREDENCE <sup>81</sup>                  | Multicentre, randomized, double-blind, placebo-controlled phase III trial<br><br>Subjects with type 2 DM and albuminuric CKD received either canagliflozin (100 mg/day) or placebo   | To assess whether canagliflozin has renal and vascular protective properties in reducing the progression of CKD in subjects with type 2 DM | Number of subjects: 4401<br><i>Canagliflozin group</i> – 2202<br><i>Placebo group</i> – 2199<br><br>Treatment with canagliflozin reduced the risk of kidney failure and cardiovascular events<br><br>Canagliflozin group had a lower risk of MACE and hHF                                                                                                                                                                                                   |
| EMPA-REG OUTCOME <sup>51,76,85,86</sup> | Multicentre, randomized, double-blind, placebo-controlled phase III trial<br><br>Subjects with type 2 DM and ASCVD received either empagliflozin (10 mg/day or 25 mg/day) or placebo | To assess the safety of treatment with empagliflozin in subjects with type 2 DM and high cardiovascular risk                               | Number of subjects: 7020<br><i>Empagliflozin 10 mg group</i> – 2345<br><i>Empagliflozin 25 mg group</i> – 2342<br><i>Placebo group</i> – 2333<br><br>Empagliflozin reduced the risk of cardiovascular death by 38%, death by any cause by 32%, and hHF by 35%<br><br>Empagliflozin showed consistent benefits in subjects with and without baseline heart failure<br><br>Empagliflozin was associated with reduced progression of CKD compared with placebo |
| VERTIS-CV <sup>72</sup>                 | Multicentre, randomized, double-blind, placebo-controlled phase III trial<br><br>Subjects with type 2 DM and ASCVD received either ertugliflozin (5 mg/day or 15 mg/day) or placebo  | To assess the cardiovascular safety of ertugliflozin in subjects with type 2 DM and established vascular disease                           | Number of subjects: 8246<br><i>Ertugliflozin group</i> – 5499<br><i>Placebo group</i> – 2747<br><br>Ertugliflozin was not inferior to placebo regarding MACE (11.9% vs 11.9%)<br><br>Death from cardiovascular causes or hHF occurred in 8.1% of subjects in the ertugliflozin group and in 9.1% of subjects in the placebo group<br><br>Amputation occurred in 2.0% of subjects treated with 5 mg of                                                       |

|                         |                                                                                                                                                                                                                                                                                                                                                                 |                                                                                                                                                                                                                                             |                                                                                                                                                                                                                                                                                                                                                                                                                                                                         |
|-------------------------|-----------------------------------------------------------------------------------------------------------------------------------------------------------------------------------------------------------------------------------------------------------------------------------------------------------------------------------------------------------------|---------------------------------------------------------------------------------------------------------------------------------------------------------------------------------------------------------------------------------------------|-------------------------------------------------------------------------------------------------------------------------------------------------------------------------------------------------------------------------------------------------------------------------------------------------------------------------------------------------------------------------------------------------------------------------------------------------------------------------|
|                         |                                                                                                                                                                                                                                                                                                                                                                 |                                                                                                                                                                                                                                             | ertugliflozin, in 2.1% of subjects treated with 15 mg of ertugliflozin, and in 1.6% of subjects who received placebo                                                                                                                                                                                                                                                                                                                                                    |
| DAPA-HF <sup>15</sup>   | Multicentre, randomized, double-blind, placebo-controlled phase III trial<br><br>Subjects with NYHA class II, III, or IV heart failure and an ejection fraction of $\leq 40\%$ received as add-on either dapagliflozin (10 mg/day) or placebo                                                                                                                   | To assess the effect of dapagliflozin in subjects with established heart failure and reduced ejection fraction and the incidence of worsening heart failure and/or cardiovascular death, regardless of the presence or absence of type 2 DM | Number of subjects: 4744<br><i>Dapagliflozin group – 2373</i><br><i>Placebo group – 2371</i><br><br>Dapagliflozin treated subjects had a lower risk of worsening heart failure (10% vs 13.7%) or death from cardiovascular causes (9.6% vs 11.5%) compared with placebo<br><br>Results in subjects with type 2 DM were similar to those without type 2 DM                                                                                                               |
| EMPEROR-R <sup>89</sup> | Randomized, double-blind, placebo-controlled phase III trial<br><br>Subjects with NYHA class II, III, or IV heart failure and an ejection fraction of $\leq 40\%$ received as add-on either empagliflozin (10 mg/day) or placebo                                                                                                                                | To assess the safety and efficacy of empagliflozin in subjects with heart failure and reduced ejection fraction                                                                                                                             | Number of subjects: 3730<br><i>Empagliflozin group – 1863</i><br><i>Placebo group – 1867</i><br><br>Adding empagliflozin to chronic therapy for heart failure resulted in lower risk of cardiovascular death or hHF compared with placebo (19.4% vs 24.7%)<br><br>Empagliflozin-treated subjects had a lower risk of serious renal outcomes with a slower annual decline in eGFR compared with placebo-treated subjects (-0.55 vs -2.28 ml/minute/1.73 m <sup>2</sup> ) |
| EMPEROR-P <sup>90</sup> | Randomized, double-blind, placebo-controlled phase III trial<br><br>Subjects with NYHA class II, III, or IV heart failure and an ejection fraction of $> 40\%$ received as add-on either empagliflozin (10 mg/day) or placebo                                                                                                                                   | To assess if empagliflozin reduces the hHF and improves survival in subjects with chronic heart failure.                                                                                                                                    | Number of subjects: 5988<br><i>Empagliflozin group – 2997</i><br><i>Placebo group – 2991</i><br><br>Empagliflozin-treated subjects had a lower incidence of cardiovascular death and hHF compared with placebo (13.8% vs 17.1%)<br><br>The positive outcomes were consistent regardless of the presence or absence of diabetes                                                                                                                                          |
| Abbreviations           | ASCVD, atherosclerotic cardiovascular disease; CKD, chronic kidney disease; eGFR, estimated glomerular filtration rate; hHF, hospitalization for heart failure; MACE, major adverse cardiovascular events; mg, milligram; NYHA, New York Heart Association; SGLT-2i, sodium-glucose cotransporter-2 inhibitors; type 2 DM, type 2 diabetes mellitus; vs, versus |                                                                                                                                                                                                                                             |                                                                                                                                                                                                                                                                                                                                                                                                                                                                         |
